# Supplementary material for: Comparison of Enzymatic Traits between Native and Recombinant Glycine Sarcosine N-Methyltransferase from Methanohalophilus portucalensis FDF1T
Source: PLOS journal article supplement (doi:10.1371/journal.pone.0168666), 2016-12-30
Supplement: S3 (10.1371/journal.pone.0168666.s003) [file journal.pone.0168666.s003]

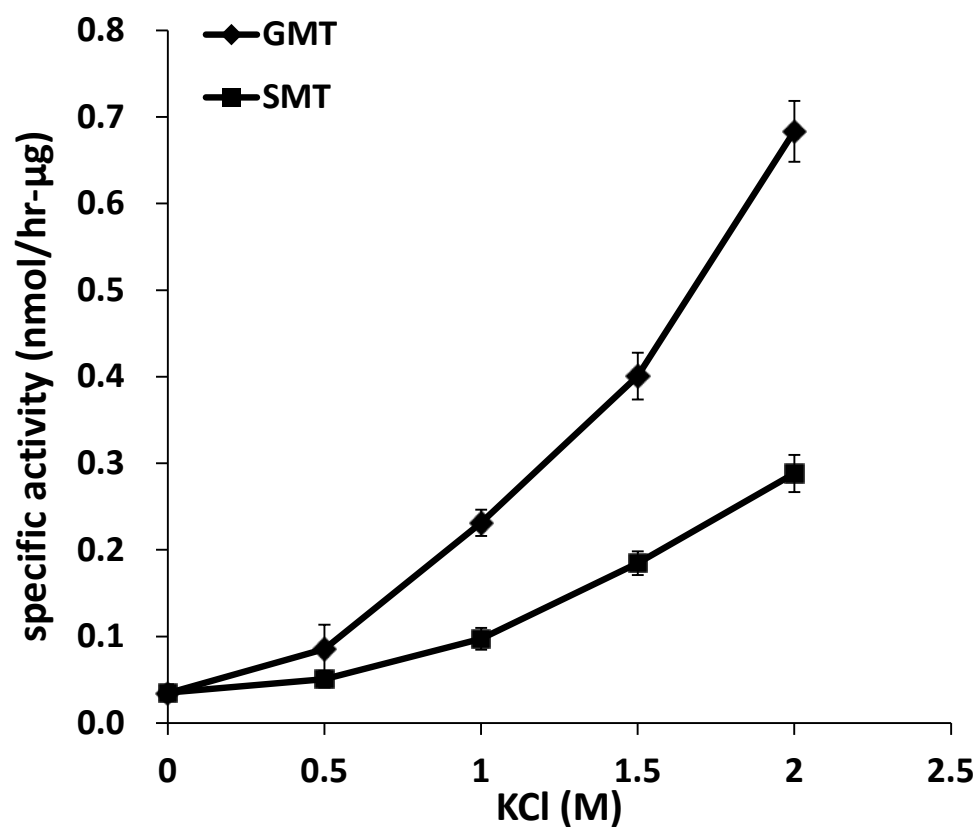

**S1 Fig. rGSMT activities were promoted by potassium ions.** Assay mixtures contained 0.1 M TES, pH 7.3, 1 mM SAM (containing 0.1  $\mu$ Ci/2 pmol [ $^3$ H-methyl]-SAM) and 0.5 M glycine or sarcosine under various concentrations of KCl. All the data points were averaged from independent triplicate experiments.
